# Supplementary material for: Fully automated synthesis of (phospho)peptide arrays in microtiter plate wells provides efficient access to protein tyrosine kinase characterization
Source: Springer Nature journal article supplement (doi:10.1186/1471-2172-6-1), 2005-01-12
Supplement: Additional file 1 [file 1471-2172-6-1-s1.pdf]

## 9H2 Antibody Responses to EGFR Array of Overlapping phosphotyrosine Peptides Sorted by Sequence #

| Array Well Position # | EGFR phosphotyrosine Peptide* | 9H2 Antibody ELISA | Relation to Deduced Epitope |
|-----------------------|-------------------------------|--------------------|-----------------------------|
| 1                     | empty (control)               | 0.068              |                             |
| 2                     | IATGMV GALLLLLVVALGIGL        | 0.078              |                             |
| 3                     | GALLLLLVVALGIGLFMRRRH         | 0.068              |                             |
| 4                     | LVVALGIGLFMRRRHIVRKRT         | 0.067              |                             |
| 5                     | IGLFMRRRHIVRKRTLRLQL          | 0.065              |                             |
| 6                     | RRHIVRKRTLRLQLQERELVE         | 0.068              |                             |
| 7                     | KRTLRLQLQERELVEPLTPSG         | 0.064              |                             |
| 8                     | LLQERELVEPLTPSGEAPNQA         | 0.064              |                             |
| 9                     | LVEPLTPSGEAPNQALLRILK         | 0.068              |                             |
| 10                    | PSGEAPNQALLRILKETEFKK         | 0.068              |                             |
| 11                    | NQALLRILKETEFKKIKVLGS         | 0.068              |                             |
| 12                    | ILKETEFKKIKVLGSGAFGTV         | 0.074              |                             |
| 13                    | FKKIKVLGSGAFGTVYKGLWI         | 0.078              |                             |
| 14                    | LGSGAFGTVYKGLWIPEGEKV         | 0.278              |                             |
| 15                    | GTVYKGLWIPEGEKVKIPVAI         | 0.169              |                             |
| 16                    | LWIPEGEKVKIPVAIKELREA         | 0.071              |                             |
| 17                    | EKVKIPVAIKELREATSPKAN         | 0.079              |                             |
| 18                    | VAIKELREATSPKANKEILDE         | 0.075              |                             |
| 19                    | REATSPKANKEILDEAYVMAS         | 0.094              |                             |
| 20                    | KANKEILDEAYVMASVDNPHV         | 0.099              |                             |
| 21                    | LDEAYVMASVDNPHVCRLGI          | 0.148              |                             |
| 22                    | MASVDNPHVCRLGICLTSTV          | 0.07               |                             |
| 23                    | PHVCRLGICLTSTVQLITQL          | 0.071              |                             |
| 24                    | LGICLTSTVQLITQLMPFGCL         | 0.07               |                             |
| 25                    | STVQLITQLMPFGCLLDYVRE         | 0.194              | homologous                  |
| 26                    | TQLMPFGCLLDYVREHKDNIG         | 0.627              | homologous                  |
| 27                    | GCLLDYVREHKDNIGSQYLLN         | 2.357              | overlap                     |
| 28                    | VREHKDNIGSQYLLNWCVQIA         | 2.653              | partial                     |
| 29                    | NIGSQYLLNWCVQIAKGMNYL         | 3.295              | overlap                     |
| 30                    | LLNWCVQIAKGMNYLEDRLV          | 1.639              | partial                     |
| 31                    | QIAKGMNYLEDRLVHRDLAA          | 1.831              | partial                     |
| 32                    | NYLEDRLVHRDLAARNVLVK          | 0.331              | partial                     |
| 33                    | RLVHRDLAARNVLVKTPQHVK         | 0.077              |                             |

|    |                        |       |           |
|----|------------------------|-------|-----------|
| 34 | LAARNVLVKTQPQHVKITDFGL | 0.083 |           |
| 35 | LVKTPQHVKITDFGLAKLLGA  | 0.091 |           |
| 36 | HVKITDFGLAKLLGAEKEYH   | 0.121 |           |
| 37 | FGLAKLLGAEKEYHAEGGKV   | 0.139 |           |
| 38 | LGAEKEYHAEGGKVPIKWMA   | 0.089 |           |
| 39 | EYHAEGGKVPIKWMALESILH  | 0.11  |           |
| 40 | GKVPIKWMALESILHRIYTHQ  | 0.105 |           |
| 41 | WMALESILHRIYTHQSDVWSY  | 0.113 |           |
| 42 | ILHRIYTHQSDVWSYGVTVWE  | 0.133 |           |
| 43 | THQSDVWSYGVTVWELMTFGS  | 0.109 |           |
| 44 | WSYGVTVWELMTFGSKPYDGI  | 0.174 |           |
| 45 | VWELMTFGSKPYDGIPASEIS  | 0.123 |           |
| 46 | FGSKPYDGIPASEISSILEKG  | 0.088 |           |
| 47 | DGIPASEISSILEKGERLPQP  | 0.069 |           |
| 48 | EISSILEKGERLPQPPICTID  | 0.073 |           |
| 49 | EKGERLPQPPICTIDVYMIMV  | 0.112 |           |
| 50 | PQPPICTIDVYMIMVKCWMID  | 0.105 |           |
| 51 | TIDVYMIMVKCWMIDADSRPK  | 0.126 |           |
| 52 | IMVKCWMIDADSRPKFRELII  | 0.074 |           |
| 53 | MIDADSRPKFRELIIIEFSKMA | 0.073 |           |
| 54 | RPKFRELIIIEFSKMARDPQRY | 0.133 |           |
| 55 | LIIIEFSKMARDPQRYLVIQGD | 2.552 | partial   |
| 56 | KMARDPQRYLVIQGDERMHLPL | 2.974 | partial   |
| 57 | QRYLVIQGDERMHLPSPTDSN  | 3.145 | partial   |
| 58 | QGDERMHLPSPTDSNFYRALM  | 0.395 |           |
| 59 | HLPSPDSNFYRALMDEEDMD   | 0.257 |           |
| 60 | DSNFYRALMDEEDMDDVVDAD  | 0.263 |           |
| 61 | ALMDEEDMDDVVDADAYLIPQ  | 0.426 | Identical |
| 62 | DMDDVVDADAYLIPQQGFSS   | 1.791 | Identical |
| 63 | DADEYLIPQQGFSSPSTSRT   | 3.147 | Identical |
| 64 | IPQQGFSSPSTSRTPLLSSL   | 0.138 |           |
| 65 | FSSPSTSRTPLLSSLSATSNN  | 0.094 |           |
| 66 | SRTPLLSSLSATSNNSTVACI  | 0.075 |           |
| 67 | SSLSATSNNSTVACIDRNLQ   | 0.07  |           |
| 68 | SNNSTVACIDRNLQSCPIKE   | 0.074 |           |
| 69 | ACIDRNLQSCPIKEDSFLQR   | 0.079 |           |
| 70 | GLQSCPIKEDSFLQRYSSDPT  | 0.133 |           |
| 71 | IKEDSFLQRYSSDPTGALTED  | 0.161 |           |
| 72 | LQRYSSDPTGALTEDSIDDTF  | 0.092 |           |

|    |                         |       |            |
|----|-------------------------|-------|------------|
| 73 | DPTGALTEDSIDDTFLPVPEY   | 0.084 |            |
| 74 | TEDSIDDTFLPVPEYINQSVP   | 0.833 | homologous |
| 75 | DTFLPVPEYINQSVPKRPAGS   | 2.481 | homologous |
| 76 | PEYINQSVPKRPAGSVQNPVY   | 2.653 | homologous |
| 77 | SVPKRPAGSVQNPVYHNQPLN   | 0.106 |            |
| 78 | AGSVQNPVYHNQPLNPAPSRD   | 0.161 |            |
| 79 | PVYHNQPLNPAPSRDPHYQDP   | 0.175 |            |
| 80 | PLNPAPSRDPHYQDPHSTAVG   | 0.096 |            |
| 81 | SRDPHYQDPHSTAVGNPEYLN   | 3.236 | overlap    |
| 82 | QDPHSTAVGNPEYLNTVQPTC   | 3.609 | Identical  |
| 83 | AVGNPEYLNTVQPTCVNSTFD   | 3.585 | Identical  |
| 84 | YLNTVQPTCVNSTFDSPAHPWA  | 3.475 | Identical  |
| 85 | PTCVNSTFDSPAHPWAQKGS HQ | 0.077 |            |
| 86 | TFDSPAHPWAQKGS HQISLDNP | 0.072 |            |
| 87 | HWAQKGS HQISLDNPDYQQDF  | 0.08  |            |
| 88 | SHQISLDNPDYQQDFFPKEAK   | 0.102 |            |
| 89 | DNPDYQQDFFPKEAKPNGIFK   | 0.184 |            |
| 90 | QDFFPKEAKPNGIFKGS TAEN  | 0.12  |            |
| 91 | EAKPNGIFKGS TAENAEYLRV  | 3.599 | Identical  |
| 92 | IFKGS TAENAEYLRVAPQSSE  | 4     | Identical  |
| 93 | AENAEYLRVAPQSSEFIGA     | 3.35  | Identical  |
| 94 | empty (control)         | 0.075 |            |
| 95 | empty (control)         | 0.073 |            |
| 96 | empty (control)         | 0.072 |            |

\*EGFR residues 646-1210, Length=21, Offset=6.
